# Supplementary material
Source: publisher figshare collection journal article supplement (https://acs.figshare.com/ndownloader/files/3597144)
Supplement: Supplementary file 1 [file 3597144]

## Supporting Information to

# Alloying and Structure of Ultrathin Gallium Films on the (111) and (110) Surfaces of Palladium

Werner Stadlmayr, Veronika Huber, Simon Penner, Bernhard Klötzer,  
Norbert Memmel

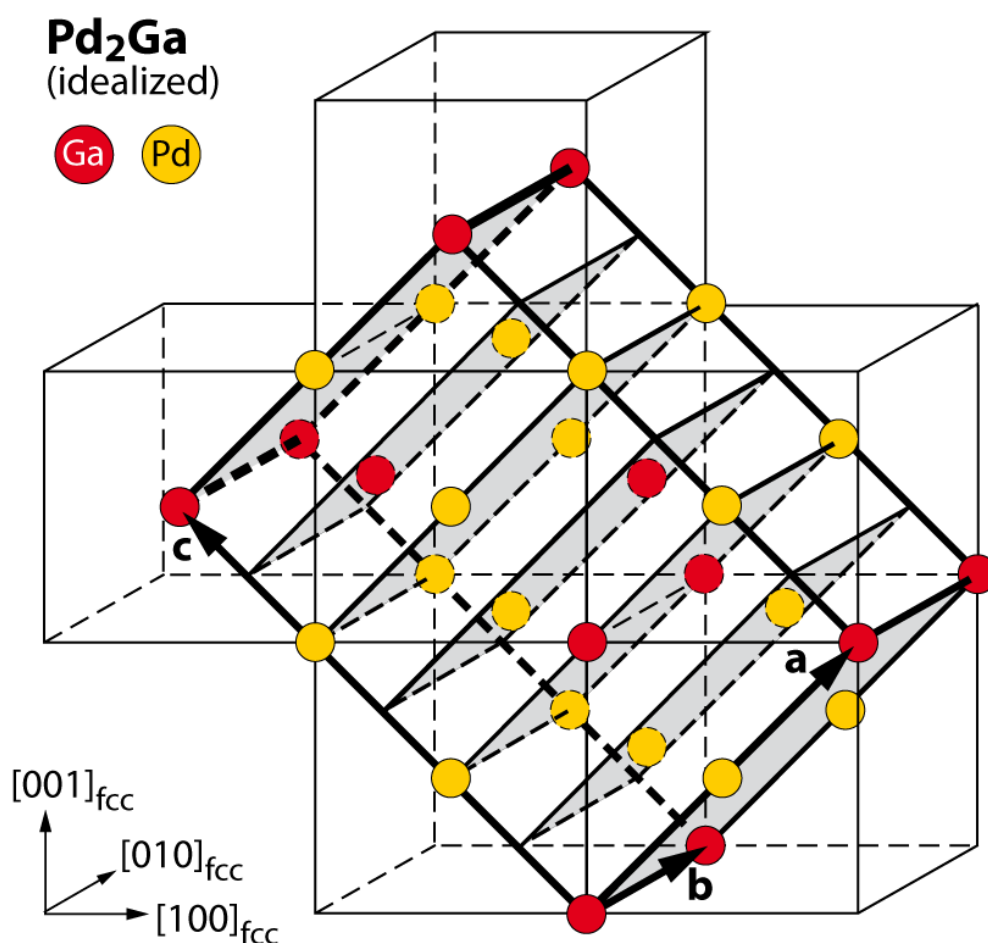

**S1** Unit cell of idealized Pd<sub>2</sub>Ga, where all atoms reside on the sites of an face-centered cubic (fcc) lattice. The planes shaded in grey exhibit a Pd<sub>2</sub>Ga(001) orientation, equivalent to fcc(-1 0 1). In the real Pd<sub>2</sub>Ga structure, atoms are distorted from these ideal fcc sites, leading to buckling of the atoms in the Pd<sub>2</sub>Ga(001) planes. For a three-dimensional representation of the real structure see Ref. 26.

<sup>26</sup> Kovnir, K.; Schmidt, M.; Waurisch, CH.; Armbrüster, M.; Prots, Y.; Grin, Y. Refinement of the Crystal Structure of Dipalladium Gallium, Pd<sub>2</sub>Ga. Z. Kristallogr. NCS **2008**, 223,7-8.

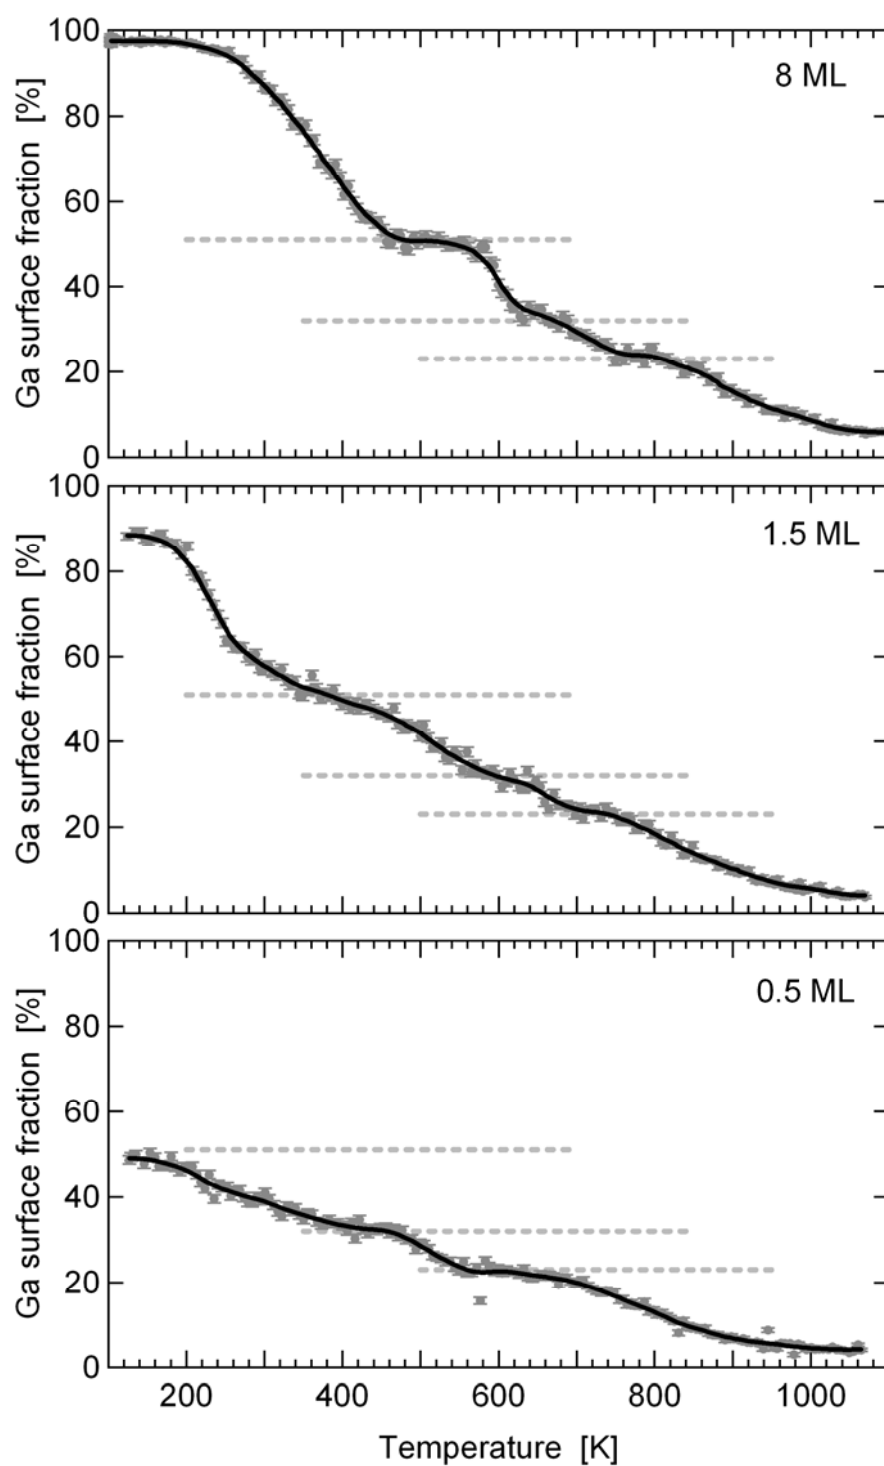

**S2** Selection of raw and smoothed temperature-programmed LEIS data for Ga/Pd(111). All plateau-like features (at Ga fractions of  $\approx 50\%$ ,  $\approx 33\%$  and  $25\%$  as indicated by the horizontal grey dashed lines) are clearly visible in both the raw and the smoothed data.
